# Supplementary material
Source: Springer Nature journal article supplement (https://www.springermedizin.de/resource/supplementary/13075_2012_3795_MOESM5_ESM.pdf/9695368)

**A****IL-28R $\alpha$** **DAPI****Merge**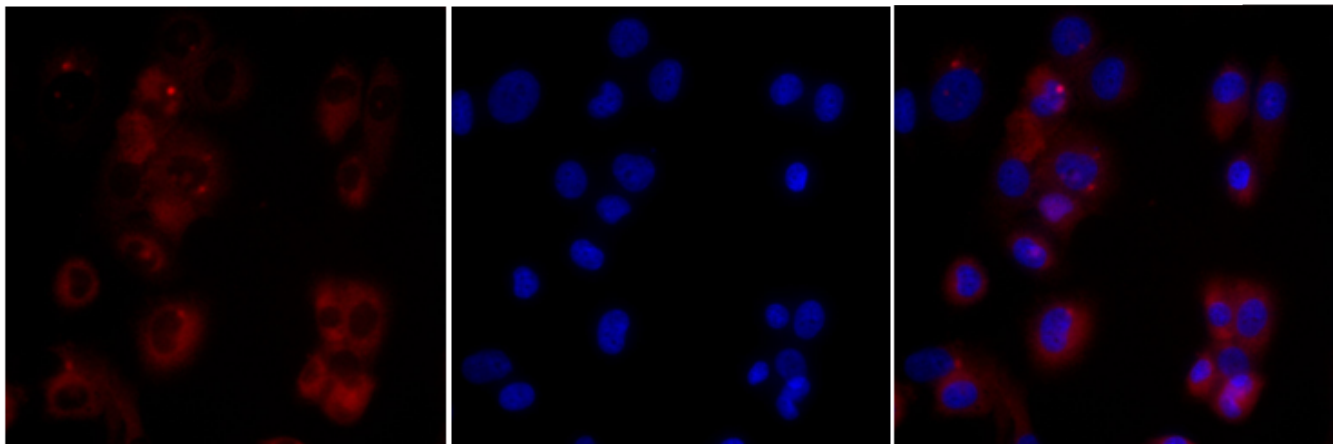**B**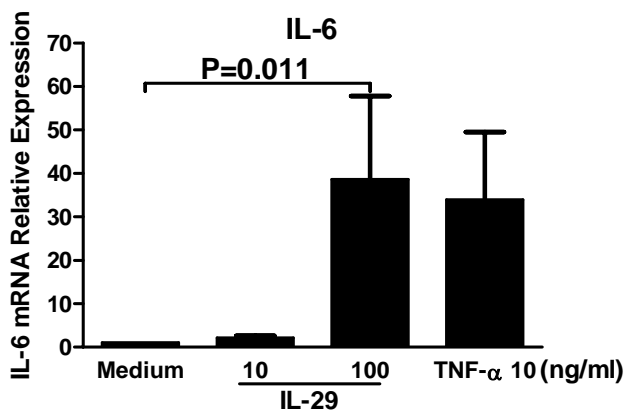**C**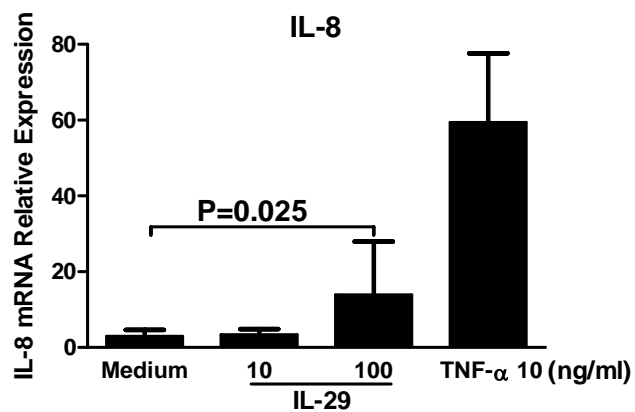**D**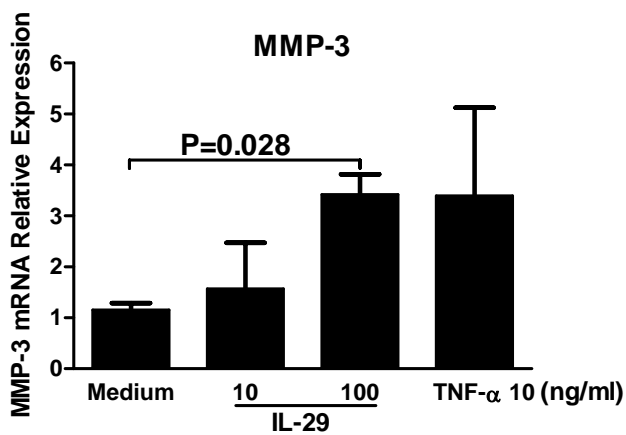**E**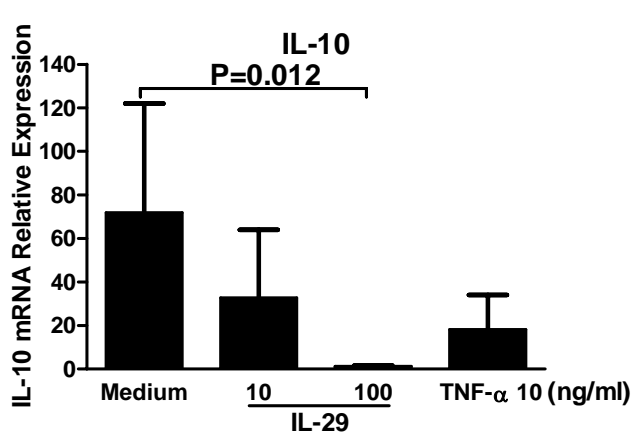

Supplement: MOESM5 [file 9695368]
